# Supplementary material for: Synthesis and structures of acyclic monoanionic tetradentate aza β-diketiminate complexes of magnesium, zinc, and cadmium
Source: Royal Society of Chemistry journal article supplement (doi:10.1039/b609616f), 2006-01-01
Supplement: b609616f.pdf [file b609616f.pdf]

## Synthesis and structures of acyclic monoanionic tetradentate aza $\beta$ -diketiminato complexes of magnesium, zinc, and cadmium

Joseph M. Fritsch, Kristen A. Thoreson, and Kristopher McNeill\*

### Electronic Supporting Information

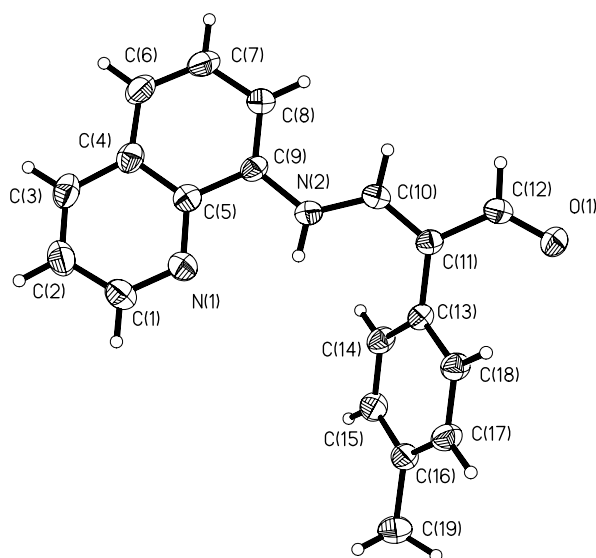

**Fig. 1** ORTEP diagram of (BDI<sup>O</sup>)OH, **5** (monoclinic crystal system) with thermal ellipsoids drawn at the 50 % probability level.

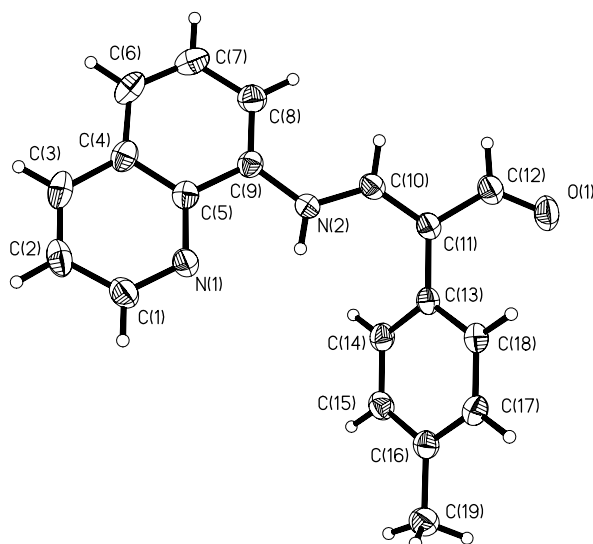

**Fig. 2** ORTEP diagram of (BDI<sup>O</sup>)OH, **5'** (triclinic crystal system) with thermal ellipsoids drawn at the 50 % probability level.
